# Supplementary material for: Genome-wide expression analysis offers new insights into the origin and evolution of Physcomitrella patens stress response
Source: PubMed Central journal article supplement (PMC4663497; doi:10.1038/srep17434), 2015-11-30
Supplement: srep17434-s1.pdf [file srep17434-s1.pdf]

## Supplementary information

### **Genome-wide expression analysis offers new insights into the origin and evolution of *Physcomitrella patens* stress response**

Basel Khraiwesh<sup>1,2,3\*</sup>, Enas Qudeimat<sup>2,3§</sup>, Manjula Thimma<sup>3§</sup>, Amphun Chaiboonchoe<sup>1§</sup>, Kenan Jijakli<sup>1</sup>, Amnah Alzahmi<sup>1</sup>, Marc Arnoux<sup>2</sup>, Kourosh Salehi-Ashtiani<sup>1,2\*</sup>

<sup>1</sup>Laboratory of Algal, Systems, and Synthetic Biology, Division of Science and Math, New York University Abu Dhabi, Abu Dhabi, UAE

<sup>2</sup>Center for Genomics and Systems Biology, New York University Abu Dhabi, Abu Dhabi, UAE

<sup>3</sup>Division of Biological and Environmental Sciences and Engineering, King Abdullah University of Science and Technology, Thuwal, KSA

§ These authors contributed equally to this work.

\* Corresponding Authors: Basel Khraiwesh ([bhk1@nyu.edu](mailto:bhk1@nyu.edu)) and Kourosh Salehi-Ashtiani ([ksa3@nyu.edu](mailto:ksa3@nyu.edu)), Center for Genomics and Systems Biology, New York University Abu Dhabi, Abu Dhabi, UAE

Supplementary Tables

**Table S1: Summary of reads and expressed genes based on the RNASeq data from *P. patens* abiotic stress treatments.**

| Features                         | 0.5 h      |            |            |            | 4.0 h      |            |            |            | Control    |
|----------------------------------|------------|------------|------------|------------|------------|------------|------------|------------|------------|
|                                  | ABA        | Cold       | Drought    | Salt       | ABA        | Cold       | Drought    | Salt       |            |
| <b>Total Reads</b>               | 24,572,598 | 25,701,402 | 22,727,146 | 21,066,004 | 23,995,124 | 26,269,396 | 24,271,618 | 22,921,412 | 26,827,908 |
| <b>Mapped Reads</b>              | 21,965,889 | 22,735,394 | 19,806,506 | 18,141,685 | 21,455,483 | 23,039,577 | 21,163,981 | 19,818,724 | 23,929,288 |
|                                  | 89.39%     | 88.46%     | 87.15%     | 86.12%     | 89.42%     | 87.71%     | 87.20%     | 86.46%     | 89.17%     |
| <b>Uniquely Mapped Reads</b>     | 20,512,728 | 21,173,562 | 19,013,472 | 16,951,836 | 19,917,780 | 22,061,344 | 20,286,906 | 18,473,814 | 22,601,958 |
|                                  | 83.48%     | 82.38%     | 83.66%     | 80.47%     | 83.01%     | 83.98%     | 83.58%     | 80.60%     | 84.20%     |
| <b>Non-Uniquely Mapped Reads</b> | 1,453,161  | 1,561,832  | 793,034    | 1,189,849  | 1,537,703  | 978,233    | 877,075    | 1,344,910  | 1,327,330  |
|                                  | 5.91%      | 6.08%      | 3.49%      | 5.65%      | 6.41%      | 3.72%      | 3.61%      | 5.87%      | 4.90%      |
| <b>Unmapped Reads</b>            | 2,606,709  | 2,966,008  | 2,920,640  | 2,924,319  | 2,539,641  | 3,229,819  | 3,107,637  | 3,102,688  | 2,898,620  |
|                                  | 10.61%     | 11.54%     | 12.85%     | 13.88%     | 10.58%     | 12.29%     | 12.80%     | 13.54%     | 10.80%     |
| <b>Number of Expressed Genes</b> | 19,591     | 20,003     | 19,438     | 19,896     | 19,575     | 19,909     | 19,312     | 19,489     | 19,822     |

**Table S2: The table shows up-regulated genes at 0.5 h with fold change > 50 in RPKM. This table is in support with Fig. 4a.**

| Gene ID               | ABA 0.5 h   | Cold 0.5 h  | Drought 0.5 h | Salt 0.5 h  | Description                                                                         |
|-----------------------|-------------|-------------|---------------|-------------|-------------------------------------------------------------------------------------|
| <b>Pp1s370_29V6.1</b> | 73.06521739 | 58.34782609 | 658.8695652   | 1117.543478 | Late embryogenesis abundant protein, LEA-3                                          |
| <b>Pp1s2_226V6.1</b>  | 57.07692308 | 63.74358974 | 400.7179487   | 590.025641  | F15D2.42; stress-responsive protein, putative [ <i>Arabidopsis thaliana</i> ]       |
| <b>Pp1s37_28V6.1</b>  | 68.85       | 53.075      | 69.175        | 69.8        | Ubiquitin ligase protein                                                            |
| <b>Pp1s266_43V6.1</b> | 109.4285714 | 58.28571429 | 418.2857143   | 423.1428571 | F11F8.28; hydrolase, alpha/beta fold family protein [ <i>Arabidopsis thaliana</i> ] |
| <b>Pp1s276_3V6.1</b>  | 94.48275862 | 19.89655172 | 189           | 156.5517241 | Transcriptional factor                                                              |
| <b>Pp1s55_253V6.1</b> | 128.8571429 | 54.57142857 | 937.2857143   | 150.8571429 | Transcriptional factor                                                              |
| <b>Pp1s43_12V6.1</b>  | 141.5625    | 235.5625    | 187.1875      | 82.3125     | Sigma factor sigb regulation protein                                                |

**Table S3: The table shows down-regulated genes at 0.5 h with fold change >10 in RPKM. This table is in support with Fig. 4b.**

| <b>Gene ID</b>        | <b>ABA 0.5 h</b> | <b>Cold 0.5 h</b> | <b>Drought 0.5 h</b> | <b>Salt 0.5 h</b> | <b>Description</b>               |
|-----------------------|------------------|-------------------|----------------------|-------------------|----------------------------------|
| <b>Pp1s660_1V6.1</b>  | -4.439415589     | -3.324242282      | -3.920464095         | -3.939613353      | Non-symbiotic hemoglobin class 1 |
| <b>Pp1s2_7V6.1</b>    | -6.631540867     | -4.561151539      | -8.14611404          | -5.631540867      | Zinc finger, B-box;CCT domain    |
| <b>Pp1s251_59V6.1</b> | -6.808964175     | -4.860596943      | -9.001609253         | -4.539837496      | Beta-expansin 3                  |
| <b>Pp1s11_29V6.1</b>  | -3.459431619     | -3.392317423      | -4.409526713         | -3.738686377      | Expansin 2                       |

**Table S4: The table shows up and down-regulated genes at 0.5 h with similar expression trend. This table is in support with Fig. 4c.**

| Gene ID                | ABA 0.5 h   | Cold 0.5 h  | Drought 0.5 h | Salt 0.5 h  | Description                                                                                                   |
|------------------------|-------------|-------------|---------------|-------------|---------------------------------------------------------------------------------------------------------------|
| <b>Pp1s100_117V6.1</b> | 1.347084708 | 1.285478548 | 1.355885589   | 1.184268427 | ATP synthase subunit beta                                                                                     |
| <b>Pp1s122_140V6.1</b> | 1.523911875 | 1.276732939 | 1.4191295     | 1.19398173  | T10P11.12; seven transmembrane MLO family protein / MLO-like protein 1 (MLO1) [ <i>Arabidopsis thaliana</i> ] |
| <b>Pp1s143_71V6.1</b>  | 0.629011553 | 0.740693196 | 0.983311938   | 0.836970475 | DS545032.1; 487504; protein_coding                                                                            |
| <b>Pp1s185_2V6.1</b>   | 0.66713593  | 0.708431097 | 0.86305334    | 0.763882371 | Glutaredoxin c4                                                                                               |
| <b>Pp1s36_294V6.1</b>  | 1.042935417 | 1.027845145 | 1.233450103   | 1.118835893 | Acyl-binding protein                                                                                          |
| <b>Pp1s37_172V6.1</b>  | 0.902439024 | 1.291666667 | 1.254065041   | 1.131097561 | No description; protein_coding                                                                                |
| <b>Pp1s39_347V6.1</b>  | 0.642169908 | 0.631832139 | 0.743398158   | 0.6209826   | Proteasome epsilon chain precursor                                                                            |
| <b>Pp1s60_311V6.1</b>  | 0.792592593 | 0.955555556 | 1.385185185   | 1.074074074 | No description                                                                                                |
| <b>Pp1s73_34V6.1</b>   | 1.559370529 | 1.904148784 | 2.258941345   | 2.075822604 | Multiple inositol polyphosphate phosphatase 1                                                                 |
| <b>Pp1s84_242V6.1</b>  | 1.322714379 | 1.343661357 | 1.635391665   | 1.642592189 | No description                                                                                                |

**Table S5: The primer sequences of the randomly selected and internal reference genes used for quantitative real-time PCR (qPCR) analysis.** This table is in support with Fig. 5.

| Gene ID        | Forward Primer        | Reverse Primer        | Gene Annotation                                              |
|----------------|-----------------------|-----------------------|--------------------------------------------------------------|
| Pp1s13_134V6.1 | CATGATTGATCGCTTGTGG   | ACCGCGATCTTTATCACCTG  | 3-hydroxyisobutyryl-coenzyme A                               |
| Pp1s56_240V6.1 | AGTGCTGGGTTTCATTCGAC  | AGCCATGTTACATCCGGAAA  | Riboflavin kinase                                            |
| Pp1s1722_1V6.1 | AGAGAGTGCGCAGACTGGAT  | ACCCGGATTCAACCAAACCTT | mRNA sequence for carbonic anhydrase                         |
| Pp1s52_261V6.1 | ATGTTGCACGGTCACAAGAA  | CGAGGAAGCCCTTCTTCTCT  | Polyadenylation Signal (PAS)                                 |
| Pp1s27_129V6.1 | AGAACACAGAGGCCAGCAGT  | ATCGTCATGTCGTTCCCATT  | No description                                               |
| Pp1s274_60V6.1 | GGCGAGCTTAGGTAAGTGCAC | CTTGGAGGTGACGACCTGAT  | F4F15.180; expressed protein [ <i>Arabidopsis thaliana</i> ] |
| Pp1s49_268V6.1 | TTCAGGAGGGCTGTGGATAA  | AGATCCCAAATGAGCTGCAC  | No description                                               |
| Pp1s4821_1V6.1 | CGAGCACACAATCATGAACC  | CTCCTTCCTCAAACAGGAACC | mRNA sequence for carbonate dehydratase                      |
| Pp1s370_29V6.1 | AAGGATGCGACCTTGAACAC  | AAACCCTGCAGTGTGTTTCC  | Late embryogenesis abundant protein, LEA-3                   |
| Pp1s55_253V6.1 | TCTGGGGATGAAGACTCAGG  | TTCACCTTAACCCATTCCA   | Transcriptional factor                                       |
| Pp1s2_7V6.1    | GAAACCGAAGGGAGAGAAGG  | CCTATCGGACCAGGCTGTAA  | Zinc finger, B-box;CCT domain                                |
| Pp1s251_59V6.1 | GTGATCCCAGATTGGTTTGG  | CTTCGTAAACTCCGCCTCTG  | Beta-expansin 3                                              |

### Supplementary Figures

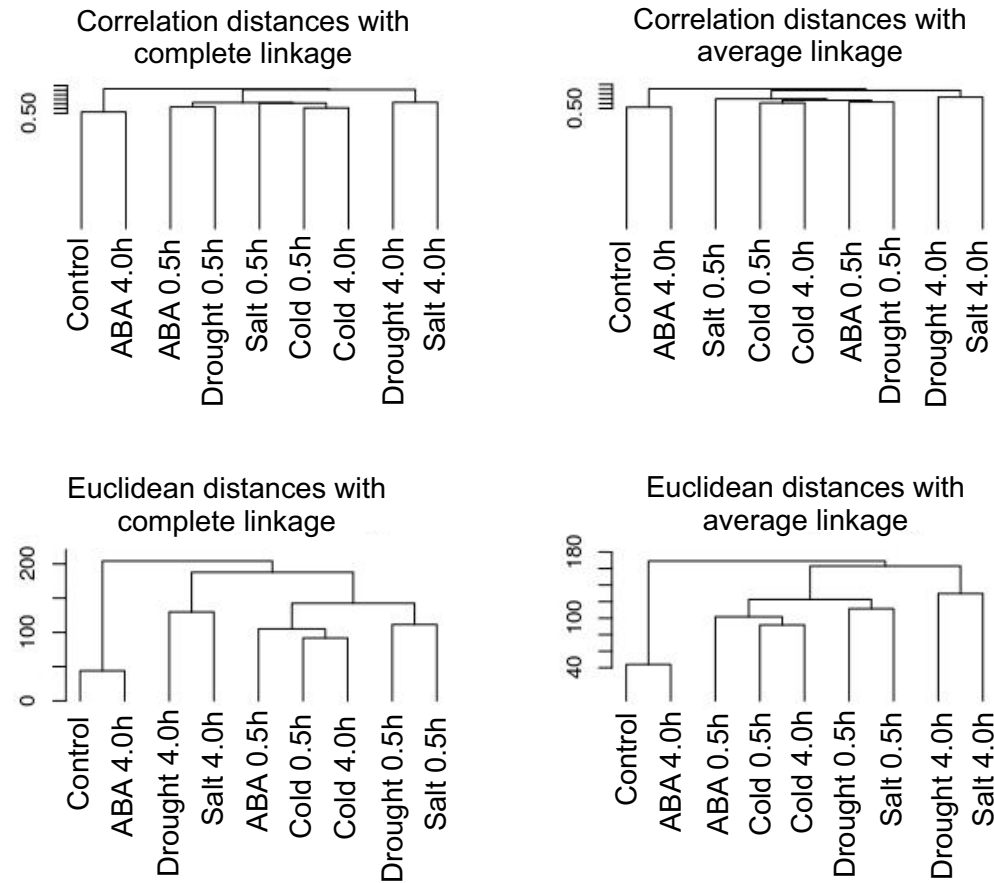

**Figure S1: Dendrograms describing the expressions profile similarities between stress responses.** The dendrograms are generated using gplots package in R (<https://cran.r-project.org/web/packages/gplots/index.html>). Each dendrogram is shown with distance and clustering methods in their titles respectively.

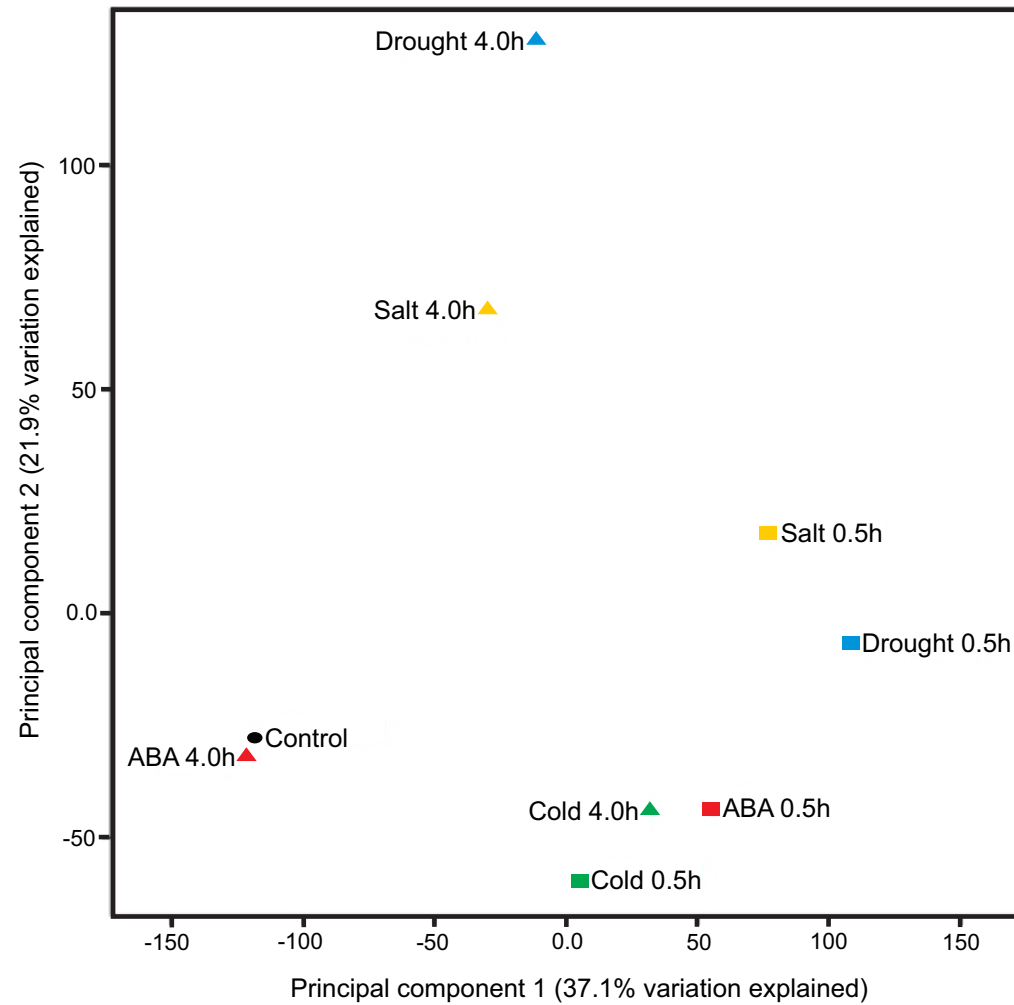

**Figure S2: The Principal Component Analysis (PCA ) plot as shown above depicts the grouping of expression profiles of each sample in the experiment.** This plot has been generated using R programming language (<https://www.r-project.org/>) with default parameters.



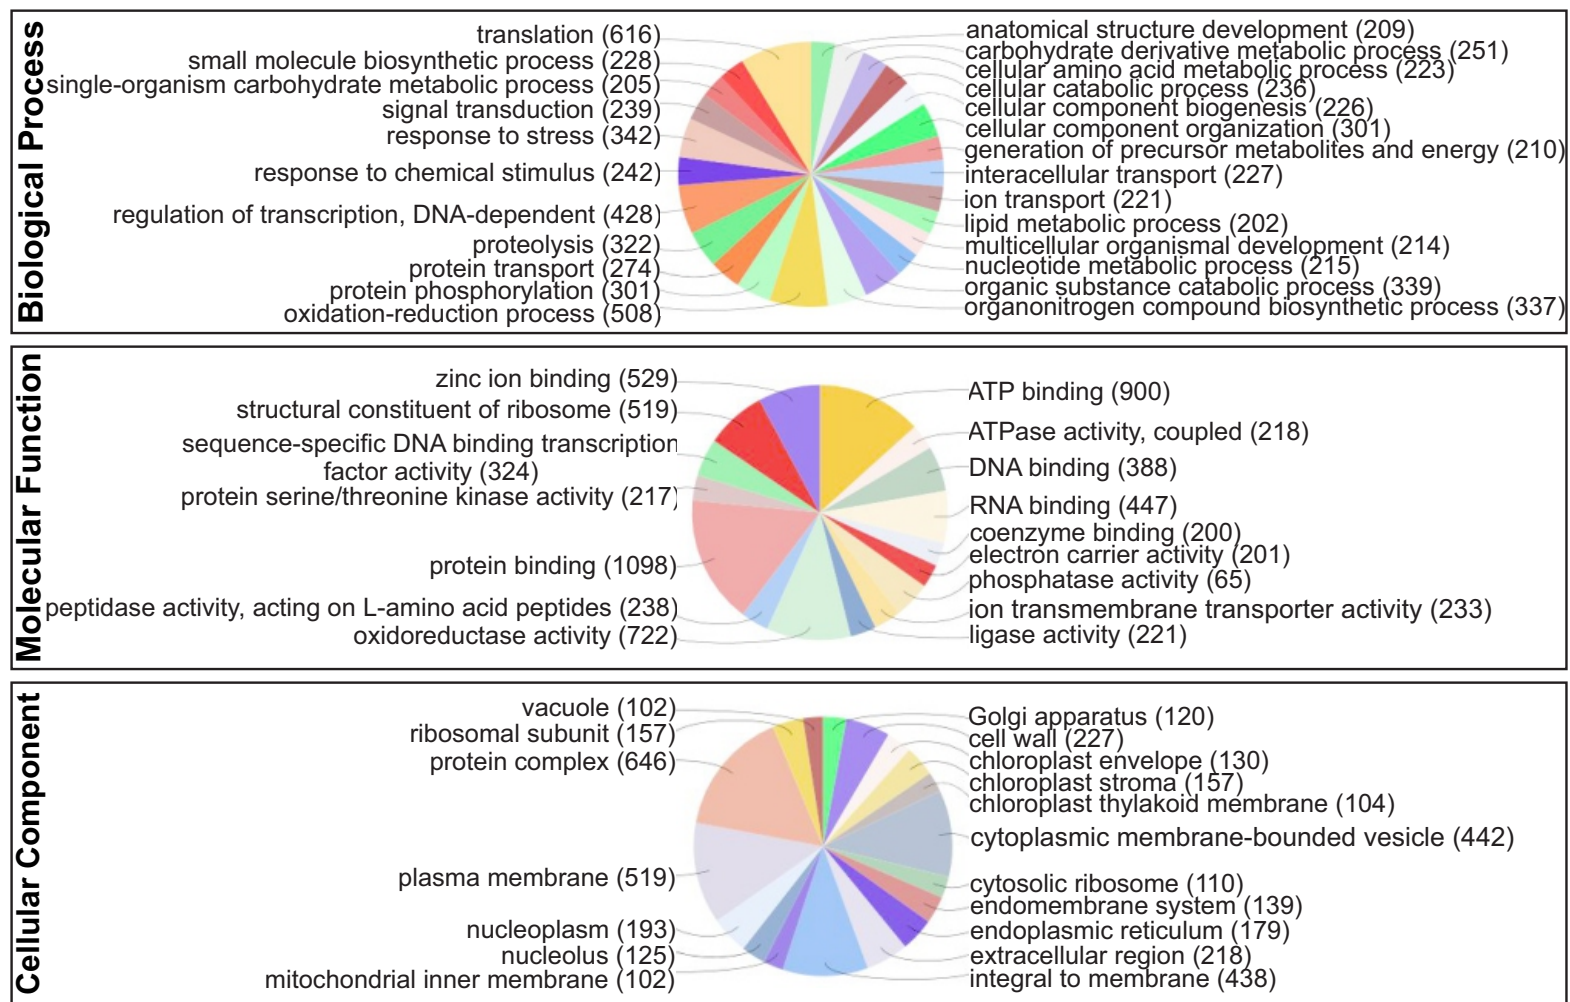

**Figure S3: Pie chart representing Gene Ontology (GO) terms distribution in *P. patens* DEGs.** DEGs were annotated in at least one of the three GO categories: biological process, molecular function and cellular component. Sequence distribution filtered by number of sequences for biological process, molecular function and cellular component with cutoff 200, 200, and 100, respectively. See **Supplementary Datasets 12-14** for the complete lists.

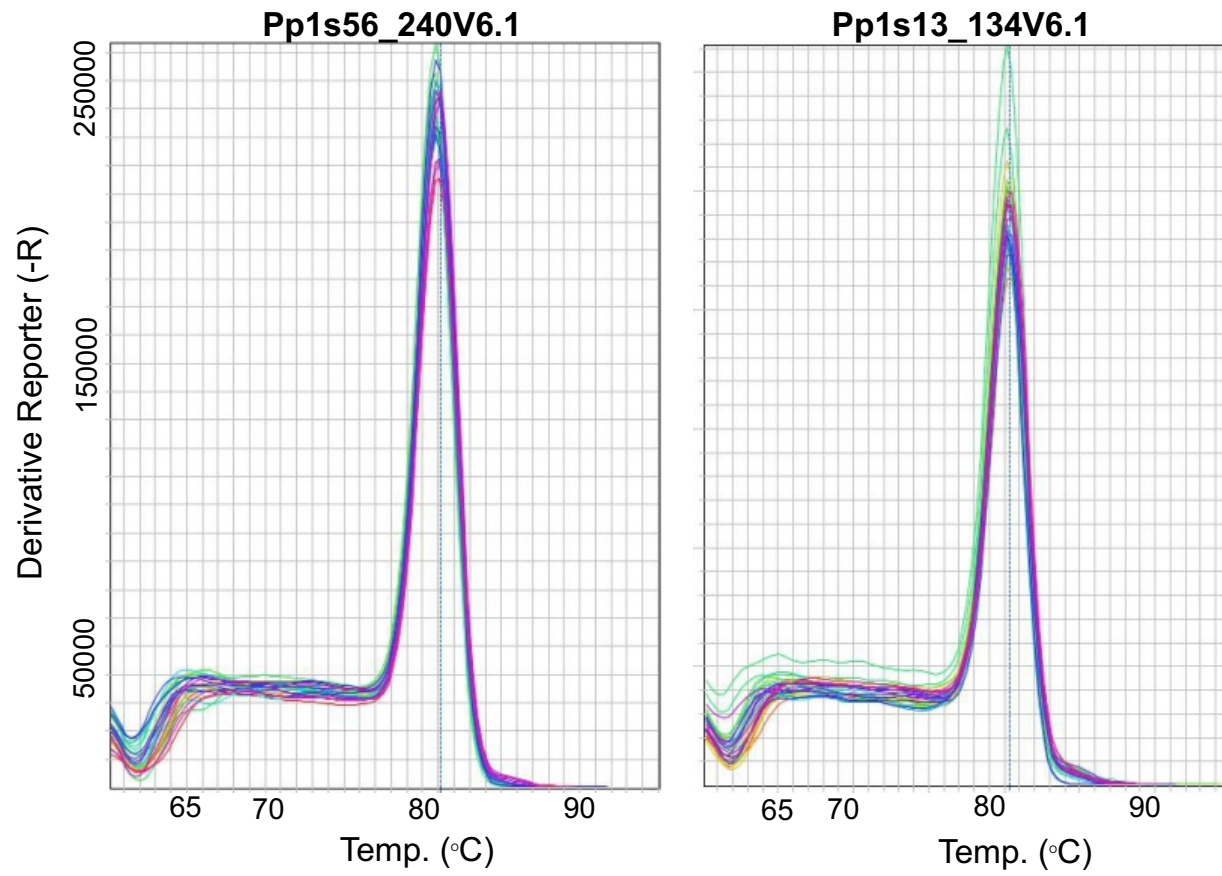

**Figure S4: Melting curves analyses for the two reference genes were used for normalization of DEGs qPCR data.**

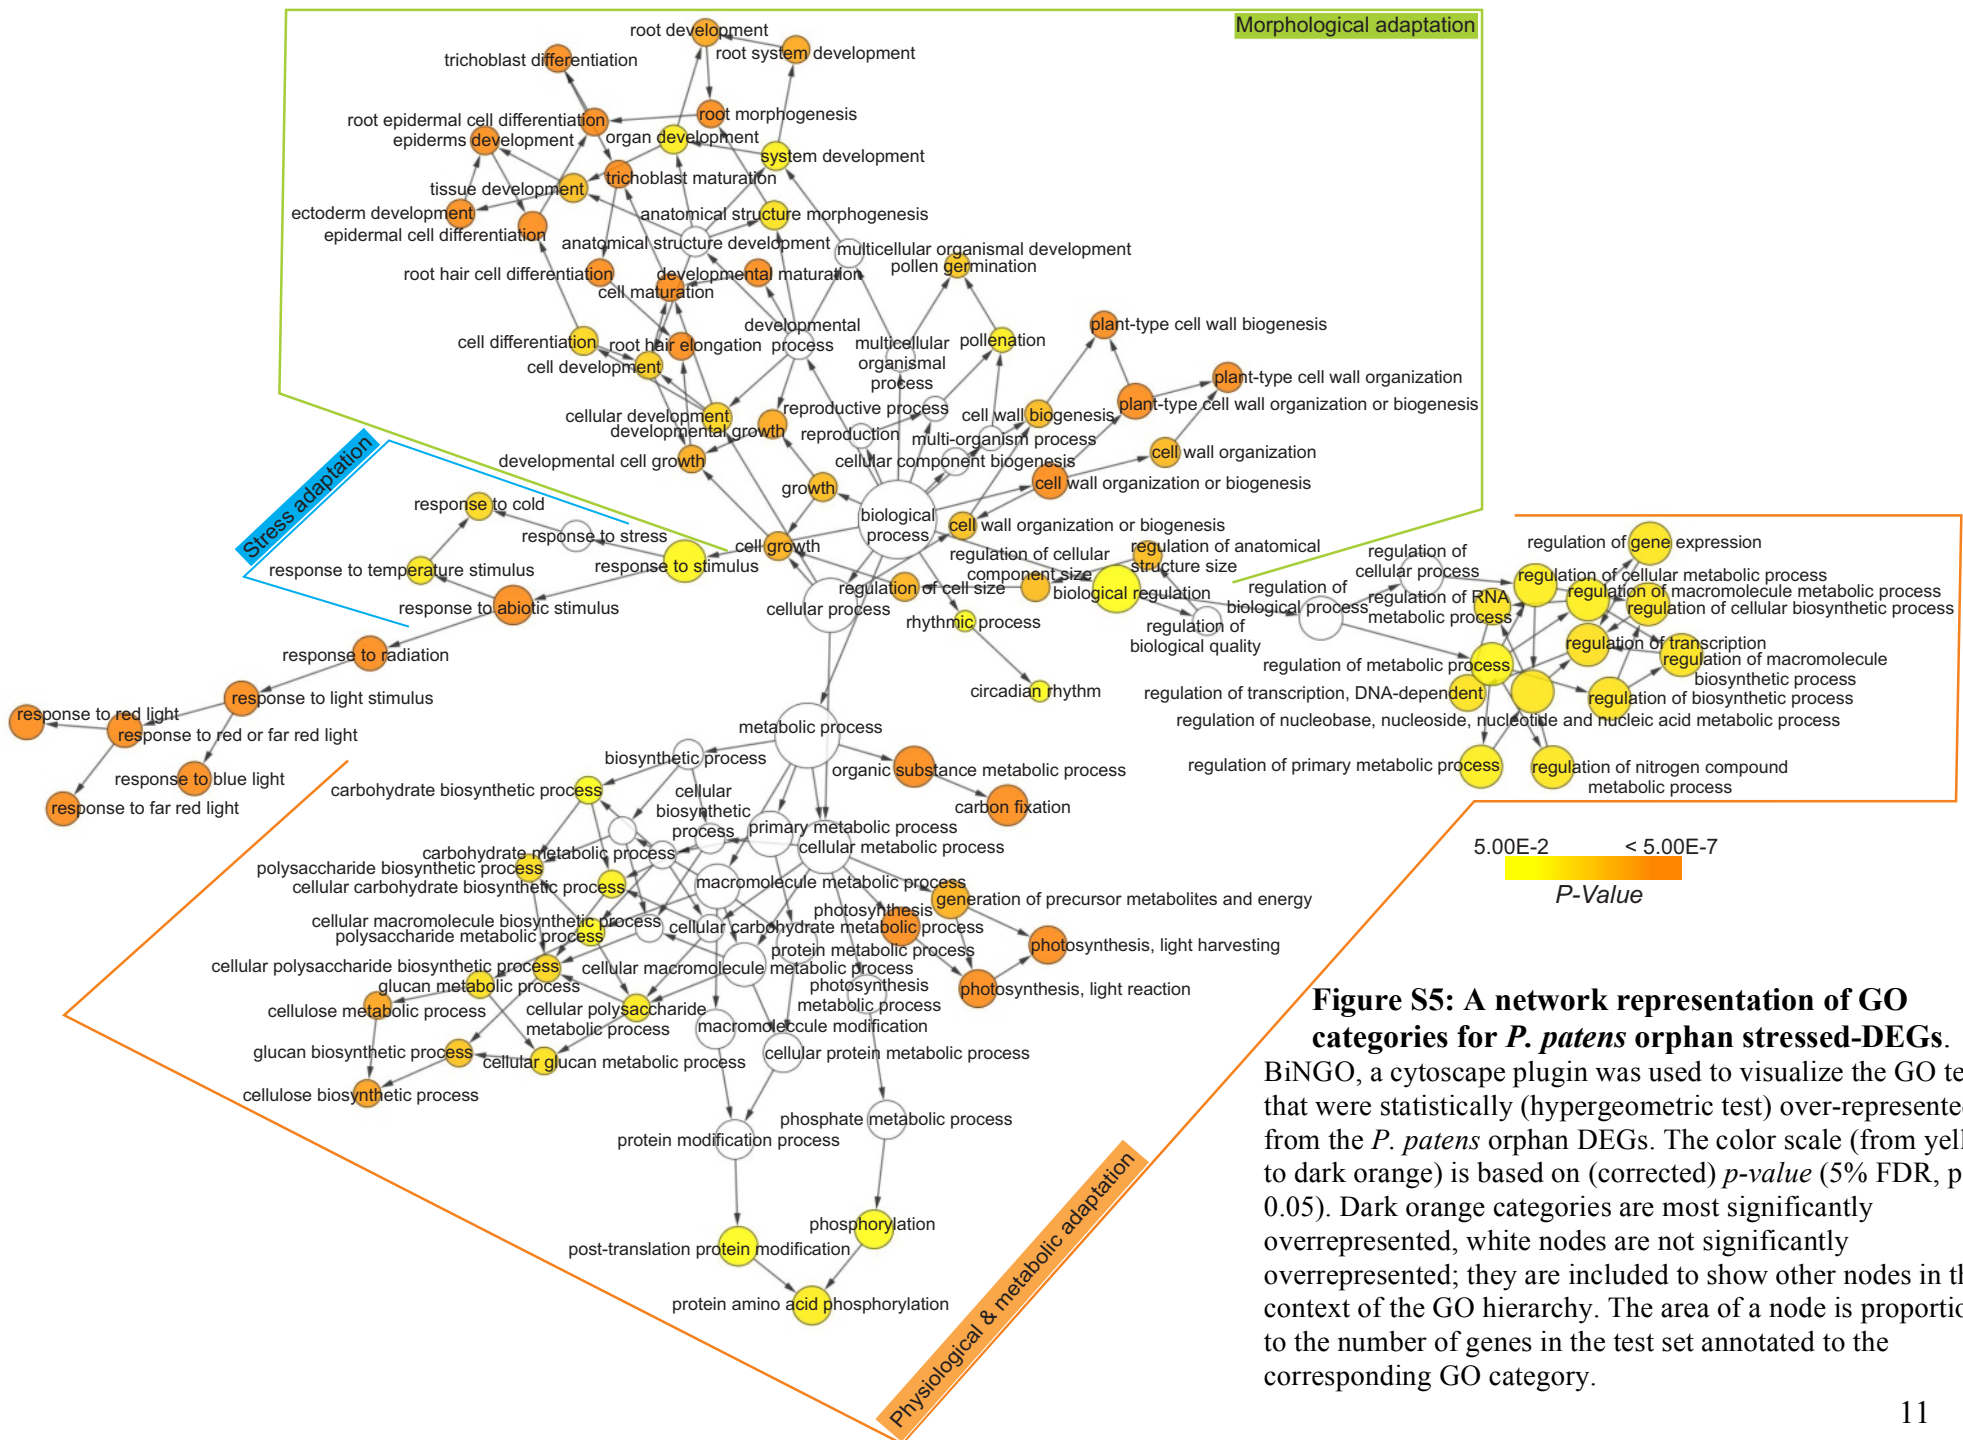

**Figure S5: A network representation of GO categories for *P. patens* orphan stressed-DEGs.** BiNGO, a cytoscape plugin was used to visualize the GO terms that were statistically (hypergeometric test) over-represented from the *P. patens* orphan DEGs. The color scale (from yellow to dark orange) is based on (corrected) *p*-value (5% FDR,  $p = 0.05$ ). Dark orange categories are most significantly overrepresented, white nodes are not significantly overrepresented; they are included to show other nodes in the context of the GO hierarchy. The area of a node is proportional to the number of genes in the test set annotated to the corresponding GO category.

## Supplementary Datasets 1-25

**Supplementary Dataset 1:** List of genes representing the degree of overlap among gene expression of *P. patens* control and ABA treated samples at different time points.

**Supplementary Dataset 2:** List of genes representing the degree of overlap among gene expression of *P. patens* control and cold treated samples at different time points.

**Supplementary Dataset 3:** List of genes representing the degree of overlap among gene expression of *P. patens* control and drought treated samples at different time points.

**Supplementary Dataset 4:** List of genes representing the degree of overlap among gene expression of *P. patens* control and salt treated samples at different time points.

**Supplementary Dataset 5:** List of expressed genes based on RPKM value across all abiotic stress treatments and the control sample. GO terms (inferred by BLAST2GO) based on the *P. patens* V1.6.

**Supplementary Dataset 6:** List of DGEs of *P. patens* in response to ABA, cold, drought and salt treatment at two different time points.

**Supplementary Dataset 7:** List of DEGs representing the degree of overlap among the two time points across all abiotic stress treatments.

**Supplementary Dataset 8:** List of up regulated genes of *P. patens* representing the degree of overlap among all studied stress treatments at 0.5 an hour.

**Supplementary Dataset 9:** List of up regulated genes of *P. patens* representing the degree of overlap among all studied stress treatments at 4.0 hours.

**Supplementary Dataset 10:** List of down regulated genes of *P. patens* representing the degree of overlap among all studied stress treatments at 0.5 an hour.

**Supplementary Dataset 11:** List of down regulated genes of *P. patens* representing the degree of overlap among all studied stress treatments at 4.0 hours.

**Supplementary Datasets 12-14:** GO terms (inferred by BLAST2GO) for DEGs based on the *P. patens* V1.6 GO annotation. Biological process (**Supplementary Dataset 12**), molecular function (**Supplementary Dataset 13**), cellular component (**Supplementary Dataset 14**).

**Supplementary Dataset 15:** List of enriched functional groups for up regulated genes based on GSEA.

**Supplementary Dataset 16:** List of enriched functional groups for down regulated genes based on GSEA.

**Supplementary Dataset 17:** A detailed BLAST-P analysis and hits of *P. patens* stressed-DEGs against all organisms in the taxonomic group of Viridiplantae.

**Supplementary Datasets 18-21:** List of DEGs representing the degree of overlap for evolutionary dynamics and orphan transcripts integrity. Orphan genes (**Supplementary Dataset 18**), *P. patens*/*C. reinhardtii* (**Supplementary Dataset 19**), *P. patens*/*S. moellendorffii* (**Supplementary Dataset 20**), *P. patens*/*A. thaliana* (**Supplementary Dataset 21**).

**Supplementary Datasets 22-25:** GO enrichment analysis of DEGs associated with evolutionary dynamics for *P. patens* orphans (**Supplementary Dataset 22**), *P. patens*/*C. reinhardtii* (**Supplementary Dataset 23**), *P. patens*/*S. moellendorffii* (**Supplementary Dataset 24**) and *P. patens*/*A. thaliana* genes (**Supplementary Dataset 25**).
